# Supplementary material for: Neuroendocrine Carcinomas of the Uterine Cervix, Endometrium, and Ovary Show Higher Tendencies for Bone, Brain, and Liver Organotrophic Metastases
Source: MDPI journal article supplement (doi:10.3390/curroncol29100587), 2022-10-06
Supplement: s1 [file s1]

**Supplementary Table S3.** Metastatic patterns of endometrial carcinomas retrieved from the Surveillance, Epidemiology, and End Results (SEER) database.

|                                                                   | Histologic subtype |                   |               |                    | P value        |                |                |              |                |                |
|-------------------------------------------------------------------|--------------------|-------------------|---------------|--------------------|----------------|----------------|----------------|--------------|----------------|----------------|
|                                                                   | NEC                | EC                | MC            | SC                 | NEC vs EC      | NEC vs MC      | NEC vs SC      | EC vs MC     | EC vs SC       | MC vs SC       |
| N                                                                 | 173                | 89637             | 702           | 10187              |                |                |                |              |                |                |
| Patients with metastasis/Total patients                           |                    |                   |               |                    |                |                |                |              |                |                |
|                                                                   | 73/165 (44.2%)     | 2725/89334 (3.1%) | 33/699 (4.7%) | 2291/10152 (22.6%) | < <b>0.001</b> | < <b>0.001</b> | < <b>0.001</b> | <b>0.011</b> | < <b>0.001</b> | < <b>0.001</b> |
| Patients with indicated organ metastasis/Total Patients           |                    |                   |               |                    |                |                |                |              |                |                |
| Bone                                                              | 16/170 (9.4%)      | 314/88478 (0.4%)  | 5/685 (0.7%)  | 125/9992 (1.3%)    | < <b>0.001</b> | < <b>0.001</b> | < <b>0.001</b> | 0.101        | < <b>0.001</b> | 0.229          |
| Brain                                                             | 6/170 (3.5%)       | 103/88478 (0.1%)  | 1/686 (0.1%)  | 15/9990 (0.2%)     | < <b>0.001</b> | < <b>0.001</b> | < <b>0.001</b> | 0.552        | 0.356          | 1.000          |
| Liver                                                             | 20/170 (11.8%)     | 351/88490 (0.4%)  | 3/686 (0.4%)  | 246/9995 (2.5%)    | < <b>0.001</b> | < <b>0.001</b> | < <b>0.001</b> | 0.756        | < <b>0.001</b> | <b>0.001</b>   |
| Lung                                                              | 18/169 (10.7%)     | 865/88480 (1.0%)  | 13/687 (1.9%) | 369/9983 (3.7%)    | < <b>0.001</b> | < <b>0.001</b> | < <b>0.001</b> | <b>0.016</b> | < <b>0.001</b> | <b>0.014</b>   |
| distant LN                                                        | 18/74 (24.3%)      | 306/38929 (0.8%)  | 1/257 (0.4%)  | 296/5060 (5.8%)    | < <b>0.001</b> | < <b>0.001</b> | < <b>0.001</b> | 0.727        | < <b>0.001</b> | < <b>0.001</b> |
| Other                                                             | 15/74 (20.3%)      | 703/38933 (1.8%)  | 8/258 (3.1%)  | 901/5064 (17.8%)   | < <b>0.001</b> | < <b>0.001</b> | 0.580          | 0.15         | < <b>0.001</b> | < <b>0.001</b> |
| Patients with indicated organ metastasis/Patients with metastasis |                    |                   |               |                    |                |                |                |              |                |                |
| Bone                                                              | 14/72 (19.4%)      | 314/2661 (11.8%)  | 5/33 (15.2%)  | 125/2243 (5.6%)    | <b>0.049</b>   | 0.596          | < <b>0.001</b> | 0.584        | < <b>0.001</b> | <b>0.037</b>   |
| Brain                                                             | 6/72 (8.3%)        | 102/2659 (3.8%)   | 1/33 (3.0%)   | 15/2238 (0.7%)     | 0.063          | 0.429          | < <b>0.001</b> | 1            | < <b>0.001</b> | 0.209          |
| Liver                                                             | 18/72 (25.0%)      | 349/2667 (13.1%)  | 3/33 (9.1%)   | 245/2242 (10.9%)   | <b>0.003</b>   | 0.058          | < <b>0.001</b> | 0.793        | <b>0.021</b>   | 1              |
| Lung                                                              | 17/71 (23.9%)      | 862/2658 (32.4%)  | 13/33 (39.4%) | 367/2233 (16.4%)   | 0.131          | 0.106          | 0.095          | 0.396        | < <b>0.001</b> | <b>0.002</b>   |
| distant LN                                                        | 15/32 (46.9%)      | 303/1300 (23.3%)  | 1/11 (9.1%)   | 295/1215 (24.3%)   | <b>0.002</b>   | <b>0.033</b>   | <b>0.004</b>   | 0.474        | 0.567          | 0.477          |
| Other                                                             | 14/32 (43.8%)      | 702/1309 (53.6%)  | 8/12 (66.7%)  | 899/1218 (73.8%)   | 0.268          | 0.176          | < <b>0.001</b> | 0.367        | < <b>0.001</b> | 0.525          |

Bolded text indicates statistically significant at 0.05 level.

NEC, neuroendocrine carcinoma; EC, endometrioid carcinoma; MC, mucinous carcinoma; SC, serous carcinoma; LN, lymph node
