# Supplementary material for: Neuroendocrine Carcinomas of the Uterine Cervix, Endometrium, and Ovary Show Higher Tendencies for Bone, Brain, and Liver Organotrophic Metastases
Source: MDPI journal article supplement (doi:10.3390/curroncol29100587), 2022-10-06
Supplement: s1 [file s1]

**Supplementary Table S1.** Metastatic patterns of uterine cervical carcinomas retrieved from the Surveillance, Epidemiology, and End Results (SEER) database.

|                                                                   | Histologic subtype |                    |                  | P value           |                   |                   |
|-------------------------------------------------------------------|--------------------|--------------------|------------------|-------------------|-------------------|-------------------|
|                                                                   | NEC                | SCC                | ADC              | NEC vs SCC        | NEC vs ADC        | SCC vs ADC        |
| N                                                                 | 495                | 19947              | 6517             |                   |                   |                   |
| Patients with metastasis/Total patients                           |                    |                    |                  |                   |                   |                   |
|                                                                   | 214/495 (43.2%)    | 2569/19947 (12.9%) | 674/6517 (10.3%) | <b>&lt; 0.001</b> | <b>&lt; 0.001</b> | <b>&lt; 0.001</b> |
| Patients with indicated organ metastasis/Total Patients           |                    |                    |                  |                   |                   |                   |
| Bone                                                              | 63/484 (13.0%)     | 467/19489 (2.4 %)  | 109/6324 (1.7%)  | <b>&lt; 0.001</b> | <b>&lt; 0.001</b> | <b>0.002</b>      |
| Brain                                                             | 11/484 (2.3%)      | 66/19483 (0.3%)    | 16/6321 (0.3%)   | <b>&lt; 0.001</b> | <b>&lt; 0.001</b> | 0.293             |
| Liver                                                             | 70/483 (14.5%)     | 346/19500 (1.8%)   | 104/6328 (1.6%)  | <b>&lt; 0.001</b> | <b>&lt; 0.001</b> | 0.489             |
| Lung                                                              | 76/483 (15.7%)     | 778/19471 (4.0%)   | 205/6319 (3.2%)  | <b>&lt; 0.001</b> | <b>&lt; 0.001</b> | <b>0.007</b>      |
| distant LN                                                        | 43/200 (21.5%)     | 551/8015 (6.9%)    | 137/2802 (4.9%)  | <b>&lt; 0.001</b> | <b>&lt; 0.001</b> | <b>&lt; 0.001</b> |
| Other                                                             | 35/495 (7.1%)      | 276/19947 (1.4%)   | 118/6517 (1.8%)  | <b>&lt; 0.001</b> | <b>&lt; 0.001</b> | <b>&lt; 0.001</b> |
| Patients with indicated organ metastasis/Patients with metastasis |                    |                    |                  |                   |                   |                   |
| Bone                                                              | 63/210 (30%)       | 466/2502 (18.6%)   | 109/647 (16.8%)  | <b>&lt; 0.001</b> | <b>&lt; 0.001</b> | 0.297             |
| Brain                                                             | 11/210 (5.2%)      | 66/2496 (2.6%)     | 16/646 (2.5%)    | <b>0.03</b>       | <b>0.047</b>      | 0.812             |
| Liver                                                             | 70/209 (33.5%)     | 346/2512 (13.8%)   | 104/654 (15.9%)  | <b>&lt; 0.001</b> | <b>&lt; 0.001</b> | 0.165             |
| Lung                                                              | 76/209 (36.4%)     | 777/2489 (31.2%)   | 205/646 (31.7%)  | 0.124             | 0.215             | 0.801             |
| distant LN                                                        | 43/91 (47.3%)      | 548/987 (55.5%)    | 137/292 (46.9%)  | 0.129             | 0.955             | <b>0.01</b>       |
| Other                                                             | 35/214 (16.4%)     | 275/2569 (10.7%)   | 117/674 (17.4%)  | <b>0.041</b>      | 0.937             | <b>&lt; 0.001</b> |

Bolded text indicates statistically significant at 0.05 level.

SCC, squamous cell carcinoma; ADC, adenocarcinoma; NEC, neuroendocrine carcinoma
