# Supplementary material for: Neuroendocrine Carcinomas of the Uterine Cervix, Endometrium, and Ovary Show Higher Tendencies for Bone, Brain, and Liver Organotrophic Metastases
Source: MDPI journal article supplement (doi:10.3390/curroncol29100587), 2022-10-06
Supplement: s1 [file s1]

**Supplementary Table S4.** Metastatic patterns of uterine cervical carcinomas retrieved from the institutional database.

|                                                                   | Histologic subtype |                  |                 | P value           |                   |                   |
|-------------------------------------------------------------------|--------------------|------------------|-----------------|-------------------|-------------------|-------------------|
|                                                                   | NEC                | SCC              | ADC             | NEC vs SCC        | NEC vs ADC        | SCC vs ADC        |
| Total patients' number                                            |                    | 53               | 3206            | 670               |                   |                   |
| Age at diagnosis                                                  | 45 (36-53)         | 51 (41-61)       | 46 (40-54)      | <b>0.001</b>      | 0.145             | <b>&lt; 0.001</b> |
| Patients with metastasis/Total patients                           | 24/53 (45.3%)      | 560/3206 (17.5%) | 153/670 (22.8%) | <b>&lt; 0.001</b> | <b>&lt; 0.001</b> | <b>0.001</b>      |
| Patients with indicated organ metastasis/Total Patients           |                    |                  |                 |                   |                   |                   |
| Bone                                                              | 12/53 (22.6%)      | 117/3206 (3.6%)  | 25/670 (3.7%)   | <b>&lt; 0.001</b> | <b>&lt; 0.001</b> | 0.918             |
| Brain                                                             | 8/53 (15.1%)       | 13/3206 (0.4%)   | 6/670 (0.9%)    | <b>&lt; 0.001</b> | <b>&lt; 0.001</b> | 0.121             |
| Liver                                                             | 9/53 (17.0%)       | 76/3206 (2.4%)   | 25/670 (3.7%)   | <b>&lt; 0.001</b> | <b>&lt; 0.001</b> | <b>0.044</b>      |
| Lung                                                              | 12/53 (22.6%)      | 143/3206 (4.5%)  | 48/670 (7.2%)   | <b>0.001</b>      | <b>&lt; 0.001</b> | <b>0.003</b>      |
| distant LN                                                        | 16/53 (30.2%)      | 408/3206 (12.7%) | 96/670 (14.3%)  | <b>0.002</b>      | <b>&lt; 0.001</b> | 0.262             |
| Other                                                             | 8/53 (15.1%)       | 212/3206 (6.6%)  | 59/670 (8.8%)   | 0.138             | <b>0.024</b>      | <b>0.043</b>      |
| Patients with indicated organ metastasis/Patients with metastasis |                    |                  |                 |                   |                   |                   |
| Bone                                                              | 12/24 (50%)        | 117/560 (20.9%)  | 25/153 (16.3%)  | <b>0.001</b>      | <b>&lt; 0.001</b> | 0.213             |
| Brain                                                             | 8/24 (33.3%)       | 13/560 (2.3%)    | 6/153 (3.9%)    | <b>&lt; 0.001</b> | <b>&lt; 0.001</b> | 0.265             |
| Liver                                                             | 9/24 (37.5%)       | 76/560 (13.6%)   | 25/153 (16.3%)  | <b>0.004</b>      | <b>0.024</b>      | 0.384             |
| Lung                                                              | 12/24 (50.0%)      | 143/560 (25.5%)  | 48/153 (31.4%)  | <b>0.008</b>      | 0.073             | 0.149             |
| distant LN                                                        | 16/24 (66.7%)      | 408/560 (72.9%)  | 96/153 (62.7%)  | 0.505             | 0.711             | <b>0.015</b>      |
| Other                                                             | 8/24 (33.3%)       | 212/560 (37.9%)  | 59/153 (38.6%)  | 0.654             | 0.623             | 0.874             |
| Pancreas                                                          | 3/24 (12.5%)       | 4/560 (0.7%)     | 1/153 (0.7%)    | <b>0.002</b>      | <b>&lt; 0.001</b> | 1                 |
| Soft tissue                                                       | 4/24 (16.7%)       | 15/560 (2.7%)    | 5/153 (3.3%)    | <b>0.006</b>      | <b>0.021</b>      | 0.782             |

Bolded text indicates statistically significant at 0.05 level.

SCC, squamous cell carcinoma; ADC, adenocarcinoma; NEC, neuroendocrine carcinoma
