# Supplementary material for: Neuroendocrine Carcinomas of the Uterine Cervix, Endometrium, and Ovary Show Higher Tendencies for Bone, Brain, and Liver Organotrophic Metastases
Source: MDPI journal article supplement (doi:10.3390/curroncol29100587), 2022-10-06
Supplement: s1 [file s1]

**Supplementary Table S2.** Metastatic patterns of ovarian carcinomas retrieved from the Surveillance, Epidemiology, and End Results (SEER) database.

|                                                                   | Histologic subtype |                 |                  |                    | <i>P</i> value    |                   |                   |                   |                   |                   |
|-------------------------------------------------------------------|--------------------|-----------------|------------------|--------------------|-------------------|-------------------|-------------------|-------------------|-------------------|-------------------|
|                                                                   | NEC                | EC              | MC               | SC                 | NEC vs EC         | NEC vs MC         | NEC vs SC         | EC vs MC          | EC vs SC          | MC vs SC          |
| N                                                                 | 242                | 4958            | 2700             | 24129              |                   |                   |                   |                   |                   |                   |
| Patients with metastasis/Total patients                           |                    |                 |                  |                    |                   |                   |                   |                   |                   |                   |
|                                                                   | 87/217 (40.1%)     | 259/4946 (5.2%) | 274/2687 (10.2%) | 7563/24028 (31.5%) | <b>&lt; 0.001</b> | <b>&lt; 0.001</b> | <b>0.007</b>      | <b>&lt; 0.001</b> | <b>&lt; 0.001</b> | <b>&lt; 0.001</b> |
| Patients with indicated organ metastasis/Total Patients           |                    |                 |                  |                    |                   |                   |                   |                   |                   |                   |
| Bone                                                              | 14/233 (6.0%)      | 13/4904 (0.3%)  | 26/2648 (1.0%)   | 158/23525 (0.7%)   | <b>&lt; 0.001</b> | <b>&lt; 0.001</b> | <b>&lt; 0.001</b> | <b>&lt; 0.001</b> | <b>0.001</b>      | 0.07              |
| Brain                                                             | 6/230 (2.6%)       | 3/4905 (0.1%)   | 2/2647 (0.1%)    | 32/23515 (0.1%)    | <b>&lt; 0.001</b> | <b>&lt; 0.001</b> | <b>&lt; 0.001</b> | 1.000             | 0.174             | 0.575             |
| Liver                                                             | 44/232 (19.0%)     | 68/4906 (1.4%)  | 78/2650 (2.9%)   | 1588/23528 (6.7%)  | <b>&lt; 0.001</b> |
| Lung                                                              | 24/230 (10.4%)     | 50/4906 (1.0%)  | 57/2644 (2.2%)   | 1267/23494 (5.4%)  | <b>&lt; 0.001</b> | <b>&lt; 0.001</b> | <b>0.001</b>      | <b>&lt; 0.001</b> | <b>&lt; 0.001</b> | <b>&lt; 0.001</b> |
| distant LN                                                        | 12/97 (12.4%)      | 12/1952 (0.6%)  | 11/1067 (1.0%)   | 746/9267 (8.0%)    | <b>&lt; 0.001</b> | <b>&lt; 0.001</b> | 0.116             | 0.209             | <b>&lt; 0.001</b> | <b>&lt; 0.001</b> |
| Other                                                             | 19/97 (19.6%)      | 50/1952 (2.6%)  | 63/1070 (5.9%)   | 2248/9308 (24.2%)  | <b>&lt; 0.001</b> | <b>&lt; 0.001</b> | 0.296             | <b>&lt; 0.001</b> | <b>&lt; 0.001</b> | <b>&lt; 0.001</b> |
| Patients with indicated organ metastasis/Patients with metastasis |                    |                 |                  |                    |                   |                   |                   |                   |                   |                   |
| Bone                                                              | 13/84 (15.5%)      | 13/247 (5.3%)   | 26/260 (10.0%)   | 157/7293 (2.2%)    | <b>0.003</b>      | 0.169             | <b>&lt; 0.001</b> | <b>0.045</b>      | <b>0.001</b>      | <b>&lt; 0.001</b> |
| Brain                                                             | 5/82 (6.1%)        | 3/248 (1.2%)    | 2/259 (0.8%)     | 32/7283 (0.4%)     | <b>0.025</b>      | <b>0.01</b>       | <b>&lt; 0.001</b> | 0.618             | 0.107             | 0.327             |
| Liver                                                             | 40/83 (48.2%)      | 68/248 (27.4%)  | 78/264 (29.5%)   | 1581/7297 (21.7%)  | <b>&lt; 0.001</b> | <b>0.002</b>      | <b>&lt; 0.001</b> | 0.594             | <b>0.031</b>      | <b>0.002</b>      |
| Lung                                                              | 19/82 (23.2%)      | 50/247 (20.2%)  | 56/258 (21.7%)   | 1263/7271 (17.4%)  | 0.573             | 0.78              | 0.169             | 0.687             | 0.242             | 0.072             |
| distant LN                                                        | 8/33 (24.2%)       | 12/84 (14.3%)   | 11/97 (11.3%)    | 735/3166 (23.2%)   | 0.198             | 0.088             | 0.889             | 0.553             | 0.055             | <b>0.006</b>      |
| Other                                                             | 16/33 (48.5%)      | 50/84 (59.5%)   | 61/100 (61.0%)   | 2206/3216 (68.6%)  | 0.279             | 0.207             | <b>0.013</b>      | 0.838             | 0.078             | 0.108             |

Bolded text indicates statistically significant at 0.05 level.

NEC, neuroendocrine carcinoma; EC, endometrioid carcinoma; MC, mucinous carcinoma; SC, serous carcinoma; LN, lymph node
